# Supplementary material for: Mitogenomic Phylogeny of Tonnoidea Suter, 1913 (1825) (Gastropoda: Caenogastropoda)
Source: MDPI journal article supplement (doi:10.3390/ani13213342), 2023-10-27
Supplement: s1 [file s1]

**Table S1.** Best fit partitions and substitution models.

|                                                 | Set Partition (Conducted by<br>PartitionFinder 2) | Best Model for BI (Selected by<br>PartitionFinder 2) |
|-------------------------------------------------|---------------------------------------------------|------------------------------------------------------|
| Best Partition CDS genes<br>(BIC=63,885)        | <i>atp6-8</i>                                     | MTMAM+I+G                                            |
|                                                 | <i>cox1-2-3</i>                                   | MTART+I+G                                            |
|                                                 | <i>cob</i>                                        | MTART+I+G                                            |
|                                                 | <i>nad1-2-3-4-4L-5-6</i>                          | MTMAM+I+G+F                                          |
| Best Partition to rRNA genes<br>(BIC= 27648.25) | <i>rrnS-L</i>                                     | GTR+I+G                                              |

**Table S2.** Basic composition of mitochondrial genome of *Monoplex pilearis*.

| Gene     | Strand | Location    | Size (bp) | Start codon | Stop codon | Intergenic nucleotides |
|----------|--------|-------------|-----------|-------------|------------|------------------------|
| Cox3     | H      | 1-780       | 780       | ATG         | TAA        | 13                     |
| tRNA-Lys | H      | 794-868     | 75        |             |            | 2                      |
| tRNA-Ala | H      | 871-940     | 70        |             |            | 33                     |
| tRNA-Arg | H      | 974-1042    | 69        |             |            | 0                      |
| tRNA-Asn | H      | 1043-1109   | 67        |             |            | 13                     |
| tRNA-Ile | H      | 1123-1194   | 72        |             |            | 2                      |
| Nad3     | H      | 1197-1550   | 354       | ATG         | TAA        | -1                     |
| tRNA-Ser | H      | 1550-1619   | 70        |             |            | -1                     |
| Nad2     | H      | 1619-2677   | 1059      | ATG         | TAA        | 154                    |
| Cox1     | H      | 2832-4367   | 1536      | ATG         | TAA        | 15                     |
| Cox2     | H      | 4383-5069   | 687       | ATG         | TAA        | -3                     |
| tRNA-Asp | H      | 5067-5136   | 70        |             |            | 0                      |
| Atp8     | H      | 5137-5295   | 159       | ATG         | TAA        | 2                      |
| Atp6     | H      | 5298-5993   | 696       | ATG         | TAA        | 34                     |
| tRNA-Met | L      | 6028-6097   | 70        |             |            | 6                      |
| tRNA-Tyr | L      | 6104-6174   | 71        |             |            | -1                     |
| tRNA-Cys | L      | 6174-6239   | 66        |             |            | -2                     |
| tRNA-Trp | L      | 6238-6307   | 70        |             |            | -3                     |
| tRNA-Gln | L      | 6305-6374   | 70        |             |            | 1                      |
| tRNA-Gly | L      | 6376-6444   | 69        |             |            | 1                      |
| tRNA-Glu | L      | 6446-6515   | 70        |             |            | 0                      |
| 12s      | H      | 6516-7494   | 979       |             |            | 0                      |
| tRNA-Val | H      | 7495-7564   | 70        |             |            | 0                      |
| 16s      | H      | 7565-8932   | 1368      |             |            | 0                      |
| tRNA-Leu | H      | 8933-9002   | 70        |             |            | 0                      |
| tRNA-Leu | H      | 9003-9073   | 71        |             |            | -1                     |
| Nad1     | H      | 9073-10003  | 941       | ATG         | TA         | 10                     |
| tRNA-Pro | H      | 10014-10080 | 67        |             |            | 2                      |
| Nad6     | H      | 10083-10583 | 501       | ATG         | TAG        | 5                      |
| Cytb     | H      | 10589-11728 | 1140      | ATG         | TAA        | 10                     |
| tRNA-Ser | H      | 11739-11805 | 67        |             |            | 1                      |
| tRNA-Thr | L      | 11807-11872 | 66        |             |            | 9                      |
| Nad4L    | H      | 11882-12178 | 297       | ATG         | TAG        | 28                     |
| Nad4     | H      | 12207-13545 | 1339      | ATG         | TAA        | 6                      |
| tRNA-His | H      | 13552-13617 | 66        |             |            | 0                      |
| Nad5     | H      | 13618-15339 | 1722      | ATG         | TAA        | 4                      |
| tRNA-Phe | H      | 15344-15412 | 69        |             |            | 150                    |

“H” indicates the heavy strand while “L” indicates the light strand.

**Table S3.** Basic composition of mitochondrial genome of *Tutufa bubo*.

| Gene     | Strand | Location    | Size (bp) | Start codon | Stop codon | Intergenic nucleotides |
|----------|--------|-------------|-----------|-------------|------------|------------------------|
| Cox3     | H      | 1-780       | 780       | ATG         | TAG        | 11                     |
| tRNA-Lys | H      | 792-864     | 73        |             |            | 40                     |
| tRNA-Ala | H      | 905-973     | 69        |             |            | 8                      |
| tRNA-Arg | H      | 982-1050    | 69        |             |            | 0                      |
| tRNA-Asn | H      | 1051-1116   | 66        |             |            | 21                     |
| tRNA-Ile | H      | 1138-1209   | 72        |             |            | 1                      |
| Nad3     | H      | 1211-1564   | 354       | ATG         | TAA        | 0                      |
| tRNA-Ser | H      | 1565-1634   | 70        |             |            | -1                     |
| Nad2     | H      | 1634-2692   | 1059      | ATG         | TAA        | 4                      |
| Cox1     | H      | 2697-4232   | 1536      | ATG         | TAG        | 14                     |
| Cox2     | H      | 4247-4933   | 687       | ATG         | TAA        | -3                     |
| tRNA-Asp | H      | 4931-5000   | 70        |             |            | 0                      |
| Atp8     | H      | 5001-5159   | 159       | ATG         | TAA        | 2                      |
| Atp6     | H      | 5162-5857   | 696       | ATG         | TAG        | 40                     |
| tRNA-Met | L      | 5898-5964   | 67        |             |            | 11                     |
| tRNA-Tyr | L      | 5976-6041   | 66        |             |            | 8                      |
| tRNA-Cys | L      | 6050-6113   | 64        |             |            | -2                     |
| tRNA-Trp | L      | 6112-6180   | 69        |             |            | -2                     |
| tRNA-Gln | L      | 6179-6245   | 67        |             |            | -1                     |
| tRNA-Gly | L      | 6245-6314   | 70        |             |            | -2                     |
| tRNA-Glu | L      | 6313-6383   | 71        |             |            | 0                      |
| 12s      | H      | 6384-7355   | 972       |             |            | 0                      |
| tRNA-Val | H      | 7356-7425   | 70        |             |            | 0                      |
| 16s      | H      | 7426-8819   | 1394      |             |            | 0                      |
| tRNA-Leu | H      | 8820-8890   | 71        |             |            | -1                     |
| tRNA-Leu | H      | 8890-8960   | 71        |             |            | -1                     |
| Nad1     | H      | 8960-9901   | 942       | ATG         | TAA        | 0                      |
| tRNA-Pro | H      | 9902-9969   | 68        |             |            | 1                      |
| Nad6     | H      | 9971-10471  | 501       | ATG         | TAA        | 24                     |
| Cytb     | H      | 10496-11635 | 1140      | ATG         | TAA        | 4                      |
| tRNA-Ser | H      | 11640-11706 | 67        |             |            | 2                      |
| tRNA-Thr | L      | 11709-11774 | 66        |             |            | 13                     |
| Nad4L    | H      | 11788-12084 | 297       | ATG         | TAG        | 10                     |
| Nad4     | H      | 12095-13451 | 1357      | ATA         | TAA        | 16                     |
| tRNA-His | H      | 13468-13532 | 65        |             |            | 0                      |
| Nad5     | H      | 13533-15254 | 1722      | ATG         | TAG        | -1                     |
| tRNA-Phe | H      | 15254-15321 | 68        |             |            | 151                    |

“H” indicates the heavy strand while “L” indicates the light strand.

Table S4. Basic composition of mitochondrial genome of *Gyrineum natator*.

| Gene     | Strand | Location    | Size (bp) | Start codon | Stop codon | Intergenic nucleotides |
|----------|--------|-------------|-----------|-------------|------------|------------------------|
| Cox3     | H      | 1-780       | 780       | ATG         | TAA        | 12                     |
| tRNA-Lys | H      | 793-861     | 69        |             |            | 10                     |
| tRNA-Ala | H      | 872-940     | 69        |             |            | 9                      |
| tRNA-Arg | H      | 950-1020    | 71        |             |            | 2                      |
| tRNA-Asn | H      | 1023-1090   | 68        |             |            | 11                     |
| tRNA-Ile | H      | 1102-1170   | 69        |             |            | 3                      |
| Nad3     | H      | 1174-1527   | 354       | ATG         | TAA        | -2                     |
| tRNA-Ser | H      | 1526-1595   | 70        |             |            | -1                     |
| Nad2     | H      | 1595-2653   | 1059      | ATG         | TAA        | 4                      |
| Cox1     | H      | 2658-4193   | 1536      | ATG         | TAA        | 16                     |
| Cox2     | H      | 4210-4896   | 687       | ATG         | TAA        | -2                     |
| tRNA-Asp | H      | 4895-4963   | 69        |             |            | 0                      |
| Atp8     | H      | 4964-5122   | 159       | ATG         | TAA        | 2                      |
| Atp6     | H      | 5125-5820   | 696       | ATG         | TAA        | 39                     |
| tRNA-Met | L      | 5860-5930   | 71        |             |            | 1                      |
| tRNA-Tyr | L      | 5932-5999   | 68        |             |            | 6                      |
| tRNA-Cys | L      | 6006-6070   | 65        |             |            | -2                     |
| tRNA-Trp | L      | 6069-6136   | 68        |             |            | -2                     |
| tRNA-Gln | L      | 6135-6199   | 65        |             |            | 0                      |
| tRNA-Gly | L      | 6200-6268   | 69        |             |            | 0                      |
| tRNA-Glu | L      | 6269-6339   | 71        |             |            | 0                      |
| 12s      | H      | 6340-7295   | 956       |             |            | 0                      |
| tRNA-Val | H      | 7296-7363   | 68        |             |            | 0                      |
| 16s      | H      | 7364-8747   | 1384      |             |            | 0                      |
| tRNA-Leu | H      | 8748-8816   | 69        |             |            | 0                      |
| tRNA-Leu | H      | 8817-8885   | 69        |             |            | 0                      |
| Nad1     | H      | 8886-9827   | 942       | ATG         | TAA        | 1                      |
| tRNA-Pro | H      | 9829-9896   | 68        |             |            | 1                      |
| Nad6     | H      | 9898-10392  | 495       | ATG         | TAG        | 23                     |
| Cytb     | H      | 10416-11555 | 1140      | ATG         | TAA        | 4                      |
| tRNA-Ser | H      | 11560-11627 | 68        |             |            | 1                      |
| tRNA-Thr | L      | 11629-11696 | 68        |             |            | 9                      |
| Nad4L    | H      | 11706-12002 | 297       | ATG         | TAG        | -7                     |
| Nad4     | H      | 11996-13369 | 1374      | ATG         | TAA        | 6                      |
| tRNA-His | H      | 13376-13441 | 66        |             |            | 0                      |
| Nad5     | H      | 13442-15163 | 1722      | ATG         | TAG        | -1                     |
| tRNA-Phe | H      | 15163-15231 | 69        |             |            | 354                    |

“H” indicates the heavy strand while “L” indicates the light strand.

Table S5. Basic composition of mitochondrial genome of *Tonna sulcosa*.

| Gene     | Strand | Location    | Size (bp) | Start codon | Stop codon | Intergenic nucleotides |
|----------|--------|-------------|-----------|-------------|------------|------------------------|
| Cox3     | H      | 1-780       | 780       | ATG         | TAG        | 11                     |
| tRNA-Lys | H      | 792-864     | 73        |             |            | 13                     |
| tRNA-Ala | H      | 878-945     | 68        |             |            | 50                     |
| tRNA-Arg | H      | 996-1064    | 69        |             |            | 4                      |
| tRNA-Asn | H      | 1069-1136   | 68        |             |            | 27                     |
| tRNA-Ile | H      | 1164-1236   | 73        |             |            | 2                      |
| Nad3     | H      | 1239-1592   | 354       | ATG         | TAG        | 6                      |
| tRNA-Ser | H      | 1599-1666   | 68        |             |            | 0                      |
| Nad2     | H      | 1595-2653   | 1059      | ATG         | TAA        | 4                      |
| Cox1     | H      | 2738-4273   | 1536      | ATG         | TAA        | 17                     |
| Cox2     | H      | 4291-4977   | 687       | ATG         | TAA        | -3                     |
| tRNA-Asp | H      | 4975-5044   | 70        |             |            | 0                      |
| Atp8     | H      | 5045-5203   | 159       | ATG         | TAA        | 25                     |
| Atp6     | H      | 5229-5924   | 696       | ATG         | TAA        | 37                     |
| tRNA-Met | L      | 5962-6031   | 70        |             |            | 6                      |
| tRNA-Tyr | L      | 6038-6105   | 68        |             |            | 10                     |
| tRNA-Cys | L      | 6116-6181   | 66        |             |            | -2                     |
| tRNA-Trp | L      | 6180-6248   | 69        |             |            | -2                     |
| tRNA-Gln | L      | 6246-6314   | 69        |             |            | 0                      |
| tRNA-Gly | L      | 6315-6381   | 67        |             |            | -1                     |
| tRNA-Glu | L      | 6381-6453   | 73        |             |            | 0                      |
| 12s      | H      | 6454-7414   | 961       |             |            | 0                      |
| tRNA-Val | H      | 7415-7482   | 68        |             |            | 0                      |
| 16s      | H      | 7483-8879   | 1397      |             |            | 0                      |
| tRNA-Leu | H      | 8880-8948   | 69        |             |            | 0                      |
| tRNA-Leu | H      | 8949-9019   | 71        |             |            | -1                     |
| Nad1     | H      | 9019-9960   | 942       | ATG         | TAG        | 0                      |
| tRNA-Pro | H      | 9961-10029  | 69        |             |            | 1                      |
| Nad6     | H      | 10031-10531 | 501       | ATG         | TAA        | 9                      |
| Cytb     | H      | 10541-11680 | 1140      | ATG         | TAA        | 5                      |
| tRNA-Ser | H      | 11686-11750 | 65        |             |            | 9                      |
| tRNA-Thr | L      | 11760-11829 | 70        |             |            | 7                      |
| Nad4L    | H      | 11837-12133 | 297       | ATG         | TAG        | -7                     |
| Nad4     | H      | 12127-13503 | 1377      | GTG         | TAA        | 12                     |
| tRNA-His | H      | 13516-13585 | 70        |             |            | -1                     |
| Nad5     | H      | 13585-15306 | 1722      | ATG         | TAG        | 0                      |
| tRNA-Phe | H      | 15307-15375 | 69        |             |            | 313                    |

“H” indicates the heavy strand while “L” indicates the light strand.

Table S6. Basic composition of mitochondrial genome of *Lotoria lotoria*.

| Gene     | Strand | Location    | Size (bp) | Start codon | Stop codon | Intergenic nucleotides |
|----------|--------|-------------|-----------|-------------|------------|------------------------|
| Cox3     | H      | 1-780       | 780       | ATG         | TAA        | 15                     |
| tRNA-Lys | H      | 796-869     | 74        |             |            | 10                     |
| tRNA-Ala | H      | 880-949     | 70        |             |            | 19                     |
| tRNA-Arg | H      | 969-1037    | 69        |             |            | 0                      |
| tRNA-Asn | H      | 1038-1105   | 68        |             |            | 15                     |
| tRNA-Ile | H      | 1121-1190   | 70        |             |            | 4                      |
| Nad3     | H      | 1195-1548   | 354       | ATG         | TAG        | 0                      |
| tRNA-Ser | H      | 1549-1616   | 68        |             |            | 0                      |
| Nad2     | H      | 1617-2675   | 1059      | ATG         | TAG        | 6                      |
| Cox1     | H      | 2682-4217   | 1536      | ATG         | TAA        | 15                     |
| Cox2     | H      | 4233-4919   | 687       | ATG         | TAA        | -3                     |
| tRNA-Asp | H      | 4917-4986   | 70        |             |            | 0                      |
| Atp8     | H      | 4987-5145   | 159       | ATG         | TAA        | 2                      |
| Atp6     | H      | 5148-5846   | 699       | ATG         | TAA        | 33                     |
| tRNA-Met | L      | 5880-5948   | 69        |             |            | 3                      |
| tRNA-Tyr | L      | 5952-6022   | 71        |             |            | 7                      |
| tRNA-Cys | L      | 6030-6095   | 66        |             |            | -2                     |
| tRNA-Trp | L      | 6094-6163   | 70        |             |            | -2                     |
| tRNA-Gln | L      | 6162-6229   | 68        |             |            | 2                      |
| tRNA-Gly | L      | 6232-6299   | 68        |             |            | 6                      |
| tRNA-Glu | L      | 6306-6376   | 71        |             |            | 0                      |
| 12s      | H      | 6377-7336   | 960       |             |            | 0                      |
| tRNA-Val | H      | 7337-7403   | 67        |             |            | 0                      |
| 16s      | H      | 7404-8764   | 1361      |             |            | 0                      |
| tRNA-Leu | H      | 8765-8834   | 70        |             |            | 0                      |
| tRNA-Leu | H      | 8835-8903   | 69        |             |            | 0                      |
| Nad1     | H      | 8904-9844   | 941       | ATG         | TA         | 0                      |
| tRNA-Pro | H      | 9845-9913   | 69        |             |            | 1                      |
| Nad6     | H      | 9915-10415  | 501       | ATG         | TAA        | 5                      |
| Cytb     | H      | 10421-11560 | 1140      | ATG         | TAA        | 6                      |
| tRNA-Ser | H      | 11567-11631 | 65        |             |            | 2                      |
| tRNA-Thr | L      | 11634-11700 | 67        |             |            | 9                      |
| Nad4L    | H      | 11710-12006 | 297       | ATG         | TAG        | -7                     |
| Nad4     | H      | 12000-13373 | 1374      | ATG         | TAA        | 5                      |
| tRNA-His | H      | 13379-13443 | 65        |             |            | 0                      |
| Nad5     | H      | 13444-15165 | 1722      | ATG         | TAA        | 13                     |
| tRNA-Phe | H      | 15179-15246 | 68        |             |            | 575                    |

“H” indicates the heavy strand while “L” indicates the light strand.

Table S7. Basic composition of mitochondrial genome of *Phalium glaucum*.

| Gene     | Strand | Location    | Size (bp) | Start codon | Stop codon | Intergenic nucleotides |
|----------|--------|-------------|-----------|-------------|------------|------------------------|
| Cox3     | H      | 1-780       | 780       | ATG         | TAA        | 14                     |
| tRNA-Lys | H      | 795-863     | 69        |             |            | 14                     |
| tRNA-Ala | H      | 878-945     | 68        |             |            | 6                      |
| tRNA-Arg | H      | 952-1020    | 69        |             |            | 14                     |
| tRNA-Asn | H      | 1035-1105   | 71        |             |            | 1                      |
| tRNA-Ile | H      | 1107-1176   | 70        |             |            | 4                      |
| Nad3     | H      | 1181-1534   | 354       | ATG         | TAA        | 3                      |
| tRNA-Ser | H      | 1538-1607   | 70        |             |            | -1                     |
| Nad2     | H      | 1607-2665   | 1059      | ATG         | TAA        | 8                      |
| Cox1     | H      | 2674-4209   | 1536      | ATG         | TAA        | 21                     |
| Cox2     | H      | 4231-4917   | 687       | ATG         | TAA        | -3                     |
| tRNA-Asp | H      | 4915-4984   | 70        |             |            | -1                     |
| Atp8     | H      | 4984-5142   | 159       | ATG         | TAA        | 18                     |
| Atp6     | H      | 5161-5856   | 696       | ATG         | TAA        | 40                     |
| tRNA-Met | L      | 5897-5965   | 69        |             |            | 15                     |
| tRNA-Tyr | L      | 5981-6049   | 69        |             |            | 9                      |
| tRNA-Cys | L      | 6059-6122   | 64        |             |            | -2                     |
| tRNA-Trp | L      | 6121-6188   | 68        |             |            | 1                      |
| tRNA-Gln | L      | 6190-6251   | 62        |             |            | 5                      |
| tRNA-Gly | L      | 6257-6324   | 68        |             |            | 6                      |
| tRNA-Glu | L      | 6331-6402   | 72        |             |            | 0                      |
| 12s      | H      | 6403-7370   | 968       |             |            | 0                      |
| tRNA-Val | H      | 7371-7441   | 71        |             |            | 0                      |
| 16s      | H      | 7442-8849   | 1408      |             |            | 0                      |
| tRNA-Leu | H      | 8850-8918   | 69        |             |            | 0                      |
| tRNA-Leu | H      | 8919-8987   | 69        |             |            | 0                      |
| Nad1     | H      | 8988-9929   | 942       | ATG         | TAA        | 0                      |
| tRNA-Pro | H      | 9930-9998   | 69        |             |            | 3                      |
| Nad6     | H      | 10002-10502 | 501       | ATG         | TAA        | 11                     |
| Cytb     | H      | 10514-11653 | 1140      | ATG         | TAA        | 8                      |
| tRNA-Ser | H      | 11662-11727 | 66        |             |            | -2                     |
| tRNA-Thr | L      | 11726-11793 | 68        |             |            | 7                      |
| Nad4L    | H      | 11801-12097 | 297       | ATG         | TAG        | -7                     |
| Nad4     | H      | 12091-13464 | 1374      | ATG         | TAG        | 14                     |
| tRNA-His | H      | 13479-13543 | 65        |             |            | 0                      |
| Nad5     | H      | 13544-15265 | 1722      | ATG         | TAA        | -1                     |
| tRNA-Phe | H      | 15265-15332 | 68        |             |            | 611                    |

“H” indicates the heavy strand while “L” indicates the light strand.

Table S8. Basic composition of mitochondrial genome of *Semicassis bisulcate*.

| Gene     | Strand | Location    | Size (bp) | Start codon | Stop codon | Intergenic nucleotides |
|----------|--------|-------------|-----------|-------------|------------|------------------------|
| Cox3     | H      | 1-780       | 780       | ATG         | TAA        | 15                     |
| tRNA-Lys | H      | 796-870     | 75        |             |            | 12                     |
| tRNA-Ala | H      | 883-951     | 69        |             |            | 3                      |
| tRNA-Arg | H      | 955-1023    | 69        |             |            | 2                      |
| tRNA-Asn | H      | 1026-1092   | 67        |             |            | 3                      |
| tRNA-Ile | H      | 1096-1164   | 69        |             |            | 4                      |
| Nad3     | H      | 1169-1522   | 354       | ATG         | TAA        | 6                      |
| tRNA-Ser | H      | 1529-1598   | 70        |             |            | -1                     |
| Nad2     | H      | 1598-2656   | 1059      | ATG         | TAA        | 9                      |
| Cox1     | H      | 2666-4201   | 1536      | ATG         | TAA        | 17                     |
| Cox2     | H      | 4219-4905   | 687       | ATG         | TAA        | -3                     |
| tRNA-Asp | H      | 4903-4972   | 70        |             |            | -1                     |
| Atp8     | H      | 4972-5130   | 159       | ATG         | TAA        | 14                     |
| Atp6     | H      | 5145-5840   | 696       | ATG         | TAA        | 34                     |
| tRNA-Met | L      | 5875-5941   | 67        |             |            | 17                     |
| tRNA-Tyr | L      | 5959-6026   | 68        |             |            | 10                     |
| tRNA-Cys | L      | 6037-6100   | 64        |             |            | -2                     |
| tRNA-Trp | L      | 6099-6176   | 69        |             |            | 3                      |
| tRNA-Gln | L      | 6171-6232   | 62        |             |            | 1                      |
| tRNA-Gly | L      | 6234-6304   | 71        |             |            | 0                      |
| tRNA-Glu | L      | 6305-6375   | 71        |             |            | 0                      |
| 12s      | H      | 6376-7339   | 964       |             |            | 0                      |
| tRNA-Val | H      | 7340-7406   | 67        |             |            | 0                      |
| 16s      | H      | 7407-8789   | 1383      |             |            | 0                      |
| tRNA-Leu | H      | 8790-8858   | 69        |             |            | 4                      |
| tRNA-Leu | H      | 8863-8931   | 69        |             |            | 0                      |
| Nad1     | H      | 8932-9873   | 942       | ATG         | TAA        | 0                      |
| tRNA-Pro | H      | 9874-9941   | 68        |             |            | 3                      |
| Nad6     | H      | 9945-10445  | 501       | ATG         | TAA        | 16                     |
| Cytb     | H      | 10462-11601 | 1140      | ATG         | TAA        | 7                      |
| tRNA-Ser | H      | 11609-11677 | 69        |             |            | -3                     |
| tRNA-Thr | L      | 11675-11741 | 67        |             |            | 9                      |
| Nad4L    | H      | 11751-12047 | 297       | ATG         | TAG        | -7                     |
| Nad4     | H      | 12041-13414 | 1374      | ATG         | TAA        | 19                     |
| tRNA-His | H      | 13434-13499 | 66        |             |            | 0                      |
| Nad5     | H      | 13500-15221 | 1722      | ATG         | TAA        | -1                     |
| tRNA-Phe | H      | 15221-15289 | 69        |             |            | 544                    |

“H” indicates the heavy strand while “L” indicates the light strand.



Table S9. Basic composition of mitochondrial genome of *Phalium flammiferum*.

| Gene     | Strand | Location    | Size (bp) | Start codon | Stop codon | Intergenic nucleotides |
|----------|--------|-------------|-----------|-------------|------------|------------------------|
| Cox3     | H      | 1-780       | 780       | ATG         | TAA        | 15                     |
| tRNA-Lys | H      | 796-865     | 70        |             |            | 18                     |
| tRNA-Ala | H      | 884-951     | 68        |             |            | 6                      |
| tRNA-Arg | H      | 958-1028    | 71        |             |            | 11                     |
| tRNA-Asn | H      | 1040-1110   | 71        |             |            | 1                      |
| tRNA-Ile | H      | 1112-1181   | 70        |             |            | 4                      |
| Nad3     | H      | 1186-1539   | 354       | ATG         | TAA        | 2                      |
| tRNA-Ser | H      | 1542-1611   | 70        |             |            | -1                     |
| Nad2     | H      | 1611-2669   | 1059      | ATG         | TAG        | 8                      |
| Cox1     | H      | 2678-4213   | 1536      | ATG         | TAA        | 19                     |
| Cox2     | H      | 4233-4919   | 687       | ATG         | TAA        | -3                     |
| tRNA-Asp | H      | 4917-4986   | 70        |             |            | -1                     |
| Atp8     | H      | 4986-5144   | 159       | ATG         | TAA        | 16                     |
| Atp6     | H      | 5161-5856   | 696       | ATG         | TAA        | 46                     |
| tRNA-Met | L      | 5903-5970   | 68        |             |            | 15                     |
| tRNA-Tyr | L      | 5986-6053   | 68        |             |            | 11                     |
| tRNA-Cys | L      | 6065-6129   | 65        |             |            | -2                     |
| tRNA-Trp | L      | 6128-6195   | 68        |             |            | 1                      |
| tRNA-Gln | L      | 6197-6258   | 62        |             |            | 2                      |
| tRNA-Gly | L      | 6261-6331   | 71        |             |            | 0                      |
| tRNA-Glu | L      | 6332-6402   | 71        |             |            | 0                      |
| 12s      | H      | 6403-7382   | 980       |             |            | 0                      |
| tRNA-Val | H      | 7383-7452   | 70        |             |            | 0                      |
| 16s      | H      | 7453-8862   | 1410      |             |            | 0                      |
| tRNA-Leu | H      | 8863-8931   | 69        |             |            | 0                      |
| tRNA-Leu | H      | 8932-9000   | 69        |             |            | 0                      |
| Nad1     | H      | 9001-9942   | 942       | ATG         | TAA        | 0                      |
| tRNA-Pro | H      | 9943-10011  | 69        |             |            | 3                      |
| Nad6     | H      | 10015-10515 | 501       | ATG         | TAA        | 13                     |
| Cytb     | H      | 10529-11668 | 1140      | ATG         | TAA        | 8                      |
| tRNA-Ser | H      | 11677-11742 | 66        |             |            | -2                     |
| tRNA-Thr | L      | 11741-11809 | 69        |             |            | 6                      |
| Nad4L    | H      | 11816-12112 | 297       | ATG         | TAG        | -7                     |
| Nad4     | H      | 12106-13479 | 1374      | ATG         | TAA        | 11                     |
| tRNA-His | H      | 13491-13555 | 65        |             |            | 0                      |
| Nad5     | H      | 13556-15277 | 1722      | ATG         | TAA        | -1                     |
| tRNA-Phe | H      | 15277-15345 | 69        |             |            | 599                    |

“H” indicates the heavy strand while “L” indicates the light strand.

Table S10. Basic composition of mitochondrial genome of *Tutufa rubeta*.

| Gene     | Strand | Location    | Size (bp) | Start codon | Stop codon | Intergenic nucleotides |
|----------|--------|-------------|-----------|-------------|------------|------------------------|
| Cox3     | H      | 1-780       | 780       | ATG         | TAG        | 11                     |
| tRNA-Lys | H      | 792-865     | 74        |             |            | 38                     |
| tRNA-Ala | H      | 904-972     | 69        |             |            | 9                      |
| tRNA-Arg | H      | 982-1050    | 69        |             |            | 1                      |
| tRNA-Asn | H      | 1052-1117   | 66        |             |            | 27                     |
| tRNA-Ile | H      | 1145-1214   | 70        |             |            | 2                      |
| Nad3     | H      | 1217-1570   | 354       | ATG         | TAA        | -1                     |
| tRNA-Ser | H      | 1570-1639   | 70        |             |            | -1                     |
| Nad2     | H      | 1639-2697   | 1059      | ATG         | TAA        | 3                      |
| Cox1     | H      | 2701-4236   | 1536      | ATG         | TAA        | 15                     |
| Cox2     | H      | 4252-4938   | 687       | ATG         | TAA        | -3                     |
| tRNA-Asp | H      | 4936-5005   | 70        |             |            | 0                      |
| Atp8     | H      | 5006-5164   | 159       | ATG         | TAA        | 2                      |
| Atp6     | H      | 5167-5862   | 696       | ATG         | TAG        | 40                     |
| tRNA-Met | L      | 5903-5968   | 66        |             |            | 9                      |
| tRNA-Tyr | L      | 5978-6047   | 70        |             |            | 6                      |
| tRNA-Cys | L      | 6054-6119   | 66        |             |            | -2                     |
| tRNA-Trp | L      | 6118-6186   | 69        |             |            | -1                     |
| tRNA-Gln | L      | 6186-6250   | 65        |             |            | 1                      |
| tRNA-Gly | L      | 6252-6319   | 68        |             |            | 0                      |
| tRNA-Glu | L      | 6320-6390   | 71        |             |            | 0                      |
| 12s      | H      | 6391-7359   | 969       |             |            | 0                      |
| tRNA-Val | H      | 7360-7428   | 69        |             |            | 0                      |
| 16s      | H      | 7429-8824   | 1396      |             |            | 0                      |
| tRNA-Leu | H      | 8825-8893   | 69        |             |            | 0                      |
| tRNA-Leu | H      | 8894-8964   | 71        |             |            | -1                     |
| Nad1     | H      | 8964-9905   | 942       | ATG         | TAA        | 0                      |
| tRNA-Pro | H      | 9906-9974   | 69        |             |            | 1                      |
| Nad6     | H      | 9976-10476  | 501       | ATG         | TAA        | 24                     |
| Cytb     | H      | 10501-11640 | 1140      | ATG         | TAA        | 5                      |
| tRNA-Ser | H      | 11646-11710 | 65        |             |            | 3                      |
| tRNA-Thr | L      | 11714-11779 | 66        |             |            | 13                     |
| Nad4L    | H      | 11793-12089 | 297       | ATG         | TAG        | -7                     |
| Nad4     | H      | 12083-13456 | 1374      | ATG         | TAA        | 15                     |
| tRNA-His | H      | 13472-13537 | 66        |             |            | 0                      |
| Nad5     | H      | 13538-15259 | 1722      | ATG         | TAG        | -1                     |
| tRNA-Phe | H      | 15259-15326 | 68        |             |            | 654                    |

“H” indicates the heavy strand while “L” indicates the light strand.
